# Supplementary material
Source: PubMed Central journal article supplement (PMC7867591)
Supplement: NIHMS1646822-supplement-125_2020_5328_MOESM1_ESM.pdf [file NIHMS1646822-supplement-125_2020_5328_MOESM1_ESM.pdf]

ESM Table 1: The proportion of participants using blood pressure and lipid medication of those with available data at each biennial follow-up

| Year of follow-up | Proportion using lipid medication | Proportion using blood pressure medication |
|-------------------|-----------------------------------|--------------------------------------------|
| Baseline          | 0.7%                              | 13.5%                                      |
| 1990-1992         | 2.8%                              | 18.0%                                      |
| 1992-1994         | 3.8%                              | 21.0%                                      |
| 1994-1996         | 4.1%                              | 22.1%                                      |
| 1996-1998         | 7.0%                              | 26.2%                                      |
| 2000-2002         | 17.3%                             | 27.6%                                      |
| 2002-2004         | 25.3%                             | 28.4%                                      |
| 2004-2006         | 48.8%                             | 26.9%                                      |
| 2006-2008         | 47.8%                             | 34.3%                                      |
| 2008-2010         | 54.6%                             | 34.3%                                      |
| 2010-2012         | 52.1%                             | 30.5%                                      |
| 2012-2014         | 50.9%                             | 33.8%                                      |
